# Supplementary material for: Multi-platform imaging in ABCA4-Associated Disease
Source: PubMed Central journal article supplement (PMC6478712; doi:10.1038/s41598-019-42772-z), 2019-04-23
Supplement: 41598_2019_42772_MOESM1_ESM.pdf [file 41598_2019_42772_MOESM1_ESM.pdf]

## Multi-platform imaging in ABCA4-Associated Disease

**Authors:** Lijuan Chen<sup>1,2</sup>, Winston Lee<sup>1</sup>, Jose Ronaldo Lima de Carvalho-Jr<sup>1,3,4</sup>, Stanley Chang<sup>1</sup>, Stephen H. Tsang<sup>1,5</sup>, Rando Allikmets<sup>1,5</sup>, Janet R. Sparrow<sup>1,5\*</sup>

### Affiliations:

<sup>1</sup>Department of Ophthalmology, Columbia University, New York, New York, United States

<sup>2</sup>Department of Ophthalmology, People's hospital of Putuo District, Shanghai, China

<sup>3</sup>Departament of Ophthalmology, Empresa Brasileira de Servicos Hospitalares (EBSERH) - Hospital das Clinicas de Pernambuco (HCPE), Federal University of Pernambuco (UFPE), Recife, Brazil.

<sup>4</sup>Department of Ophthalmology, Federal University of São Paulo (UNIFESP), São Paulo, Brazil

<sup>5</sup>Department of Pathology and Cell Biology, Columbia University, New York, New York, United States

\*Corresponding author: [jrs88@cumc.columbia.edu](mailto:jrs88@cumc.columbia.edu)

### Supplementary Materials

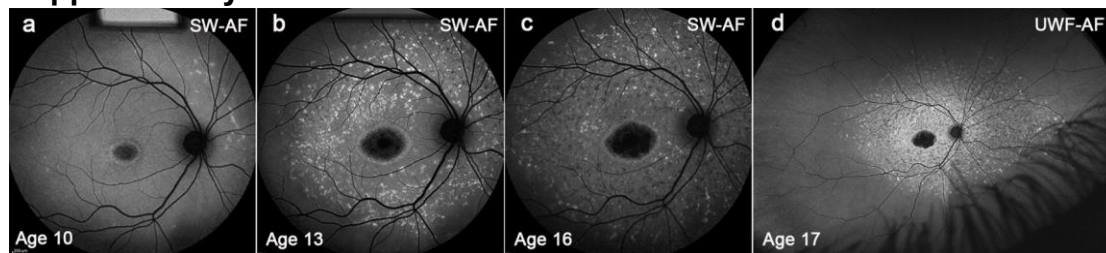

**Figure S1. Longitudinal disease changes in STGD1 patient with early onset. Group III.** Patient (P) 20. (a) Blue/SW-AF. At baseline, age 10, some flecks are visible in the superonasal field. (b) Blue/SW-AF. Age 13, flecks have spread throughout the 55° field. (c) Blue/SW-AF. Age 16. Flecks are more widespread than is visible within the 55° field (d) Green/UWF-AF. Age 17. Flecks extend into far peripheral retina.
